# Supplementary material for: Peer review in the reporting of clinical trials in Arthroplasty Today
Source: PubMed Central journal article supplement — Arthroplast Today. 2019 May 15;5(2):133–4. doi: 10.1016/j.artd.2019.04.002 (PMC6588819; doi:10.1016/j.artd.2019.04.002), 2019-05-15
Supplement: mmc4.pdf [file mmc4.pdf]

# CONFLICT OF INTEREST STATEMENT

## *American Association of Hip and Knee Surgeons*

(Adopted from the American Academy of Orthopaedic Surgeons disclosure statement)

The following form **must be filled out completely and submitted by each author (example, 6 authors, 6 forms).**  
**All items require a response. If there is no relevant disclosure for a given item, enter "None."**

Manuscript Title: Peer review in the reporting of clinical trials in *Arthroplasty Today*

1. Royalties from a company or supplier (The following conflicts were disclosed)  
*Depuy - Synthes*
2. Speakers bureau/paid presentations for a company or supplier (The following conflicts were disclosed)
- 3A. Paid employee for a company or supplier (The following conflicts were disclosed)
- 3B. Paid consultant for a company or supplier (The following conflicts were disclosed)  
*Depuy - Synthes  
Med Envision*
- 3C. Unpaid consultants for a company or supplier (The following conflicts were disclosed)
4. Stock or stock options in a company or supplier (The following conflicts were disclosed)
5. Research support from a company or supplier as a Principal Investigator (The following conflicts were disclosed)
6. Other financial or material support from a company or supplier (The following conflicts were disclosed)
7. Royalties, financial or material support from publishers (The following conflicts were disclosed)
8. Medical/Orthopaedic publications editorial/governing board (The following conflicts were disclosed)  
*Elsevier - JOR Editor*
9. Board member/committee appointments for a society (The following conflicts were disclosed)  
*AATKS Board, Publications committee*

**Each author must sign AND print or type his/her name, date and submit a separate form**

In addition, one BLINDED Conflict of Interest form (no author names used) should be submitted per manuscript with all author disclosures.

*J. Bohannon Mason*  
Author Name (Print or Type)

*[Signature]*  
Author Signature

*3/4/19*  
Date
