# Supplementary material for: Peer review in the reporting of clinical trials in Arthroplasty Today
Source: PubMed Central journal article supplement — Arthroplast Today. 2019 May 15;5(2):133–4. doi: 10.1016/j.artd.2019.04.002 (PMC6588819; doi:10.1016/j.artd.2019.04.002), 2019-05-15
Supplement: mmc6.pdf [file mmc6.pdf]

# CONFLICT OF INTEREST STATEMENT

## *American Association of Hip and Knee Surgeons*

(Adopted from the American Academy of Orthopaedic Surgeons disclosure statement)

The following form **must be filled out completely and submitted by each author (example, 6 authors, 6 forms)**. **All items require a response. If there is no relevant disclosure for a given item, enter "None."**

### Peer review in the reporting of clinical trials in *Arthroplasty Today*

---

1. Royalties from a company or supplier (The following conflicts were disclosed)  
OrthoSensor, Inc
2. Speakers bureau/paid presentations for a company or supplier (The following conflicts were disclosed)  
OrthoSensor, Inc
- 3A. Paid employee for a company or supplier (The following conflicts were disclosed)  
None
- 3B. Paid consultant for a company or supplier (The following conflicts were disclosed)  
OrthoSensor, Inc
- 3C. Unpaid consultants for a company or supplier (The following conflicts were disclosed)  
None
4. Stock or stock options in a company or supplier (The following conflicts were disclosed)  
OrthoSensor, Inc
5. Research support from a company or supplier as a Principal Investigator (The following conflicts were disclosed)  
OrthoSensor, Inc
6. Other financial or material support from a company or supplier (The following conflicts were disclosed)  
None
7. Royalties, financial or material support from publishers (The following conflicts were disclosed)  
None
8. Medical/Orthopaedic publications editorial/governing board (The following conflicts were disclosed)  
Journal of Arthroplasty; Deputy Editor for Arthroplasty Today
9. Board member/committee appointments for a society (The following conflicts were disclosed)  
Publications Committee Chair, AAHKS; Virginia Orthopaedic Society Board

**Each author must sign AND print or type his/her name, date and submit a separate form**

In addition, one BLINDED Conflict of Interest form (no author names used) should be submitted per manuscript with all author disclosures.

Author Name (Print or Type)

Author Signature

Date
